# Supplementary material for: Ecofriendly Preparation of Rosmarinic Acid-poly(vinyl alcohol) Biofilms Using NADES/DES, Ultrasounds and Optimization via a Mixture-Process Design Strategy
Source: MDPI journal article supplement (doi:10.3390/ma17020377), 2024-01-12
Supplement: s1 [file s1]

## SUPPLEMENTARY MATERIAL

### **Ecofriendly preparation of rosmarinic acid-poly(vinyl alcohol) biofilms using NADES, ultrasounds and optimization *via* a mixture-process design strategy**

Beatrice Campanella<sup>1</sup>, Mattia Simoncini<sup>2</sup>, Elisa Passaglia<sup>1</sup>, Francesca Cicogna<sup>1</sup>, Gianluca Ciancaleoni<sup>2</sup>, Josè Gonzalez Rivera<sup>3</sup>, Luca Bernazzani<sup>2</sup>, Emilia Bramanti<sup>1,\*</sup>

<sup>1</sup> National Research Council, Institute for the Chemistry of Organometallic Compounds, via Giuseppe Moruzzi 1, Pisa, 56124, Italy

<sup>2</sup> University of Pisa, Department of Chemistry and Industrial Chemistry, via Giuseppe Moruzzi 13, Pisa, 56124, Italy

<sup>3</sup> National Research Council, National Institute of Optics, via Giuseppe Moruzzi 1, Pisa, 56124, Italy

\*Corresponding authors: emilia.bramanti@cnr.it

#### **Table of contents da rivedere**

|           |       |   |
|-----------|-------|---|
| Table S1  | ..... | 2 |
| Figure S1 | ..... | 3 |
| Figure S2 | ..... | 4 |

**Table S1.** Experimental plan of the mixture-process design.

| <b>exp</b> | <b>PC1</b> | <b>PC2</b> | <b>PC3</b> | <b>X1</b> | <b>X2</b> |
|------------|------------|------------|------------|-----------|-----------|
| #1         | 1          | 0          | 0          | -1        | -1        |
| #2         | 0.333      | 0.333      | 0.333      | -1        | -1        |
| #3         | 0          | 0.5        | 0.5        | -1        | -1        |
| #4         | 1          | 0          | 0          | 0         | -1        |
| #5         | 0          | 1          | 0          | 0         | -1        |
| #6         | 0          | 0          | 1          | 1         | -1        |
| #7         | 0.5        | 0          | 0.5        | 1         | -1        |
| #8         | 0.5        | 0.5        | 0          | 1         | -1        |
| #9         | 1          | 0          | 0          | -1        | 0         |
| #10        | 0.333      | 0.333      | 0.333      | -1        | 0         |
| #11        | 0.5        | 0.5        | 0          | 0         | 0         |
| #12        | 0          | 0          | 1          | 0         | 0         |
| #13        | 0          | 0.5        | 0.5        | 1         | 0         |
| #14        | 0.5        | 0          | 0.5        | -1        | 1         |
| #15        | 0.333      | 0.333      | 0.333      | -1        | 1         |
| #16        | 0          | 0.5        | 0.5        | -1        | 1         |
| #17        | 0.5        | 0          | 0.5        | 0         | 1         |
| #18        | 0.5        | 0.5        | 0          | 0         | 1         |
| #19        | 0          | 1          | 0          | 1         | 1         |
| #20        | 0          | 0          | 1          | 1         | 1         |

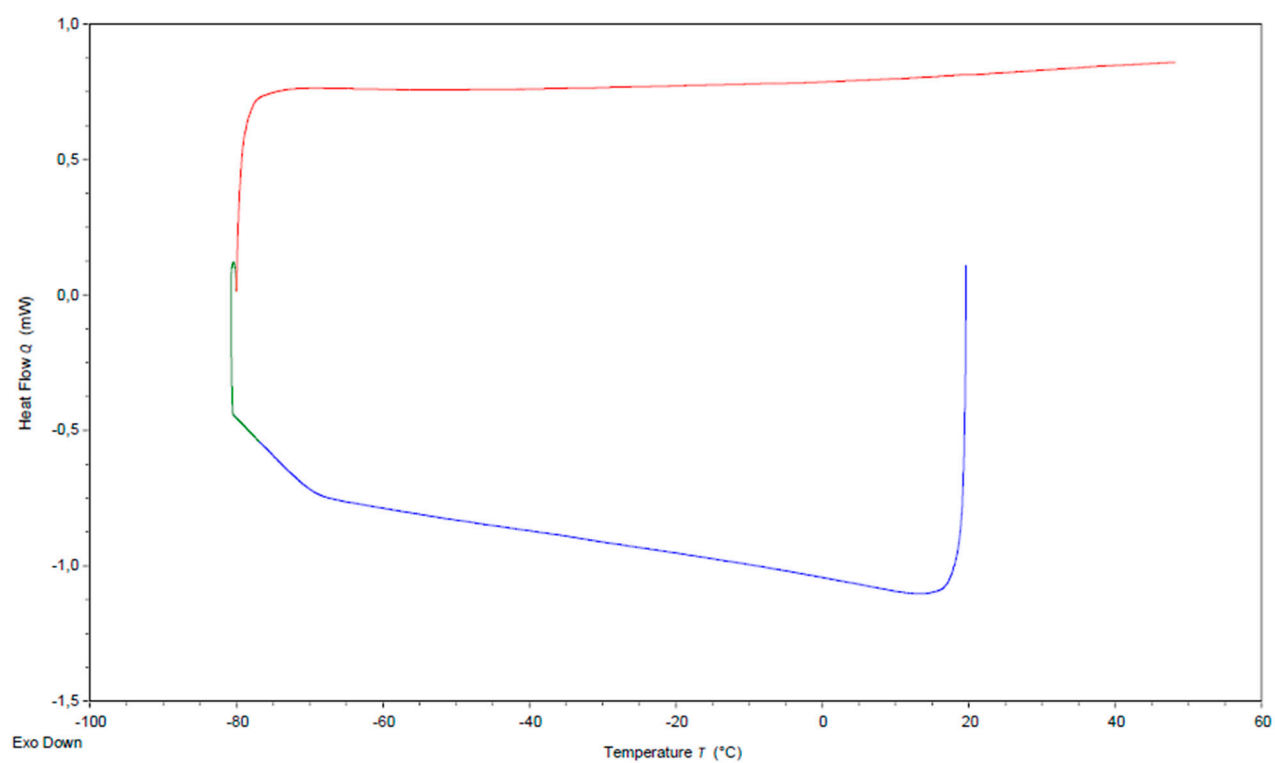

**Figure S1.** DSC analysis of the LA:EG 1:1 mixture. Blue line: cooling down; green line: isotherm; red line: heating.

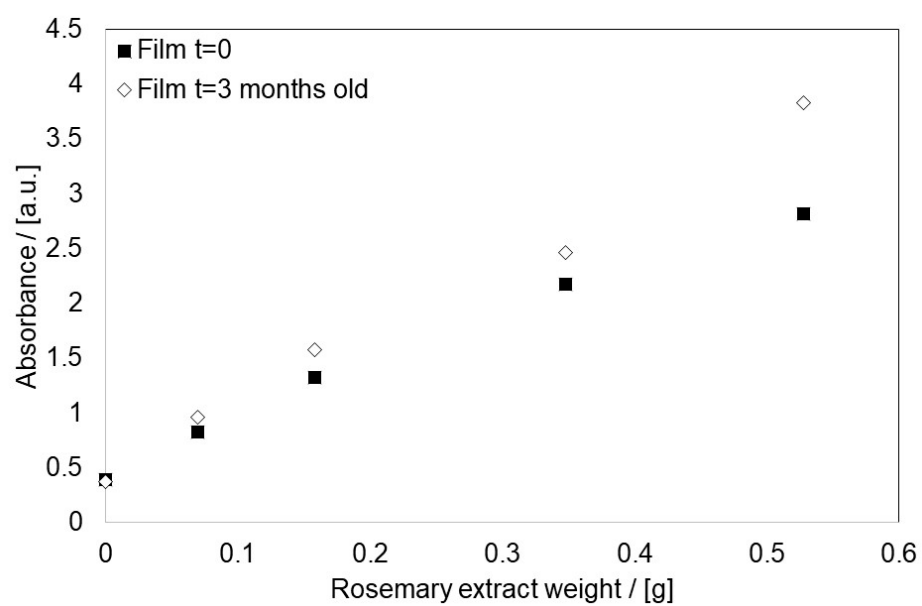

**Figure S2.** Calibration curve at 330 nm of fresh and 3 months old PVA films containing increasing quantities (from 75  $\mu$ L to 500  $\mu$ L) of rosemary extract.
